# Supplementary material
Source: publisher figshare collection journal article supplement (https://gsajournals.figshare.com/ndownloader/files/18736358)
Supplement: Supplementary file 1 [file 18736358]

## Sheet: All Genes
ABHD5
ACAD11
ACVR2A
ADCYAP1
ADD3
ADGRG6
AGA
AIDA
AKTIP
ALCAM
ALG12
ANGEL2
ANKH
APCDD1
API5
ARC
ARFGAP1
ARHGAP15
ARHGEF3
ARL6
ARMC1
ARSH
ASB7
ASCC3
ATP5G3
ATP6V0A4
BARX2
BASP1
BCKDHB
BLOC1S5
BMP2
BMP3
BMP4
BMPR1A
BMS1
BORA
BRAF
BRD1
BRD7
C1H21ORF91
C1orf145
C2H6orf52
C2H8ORF22
C7orf73
C8H1ORF146
CALCRL
CALD1
CARMIL1
CBX4
CCDC50
CCK
CCKAR
CCR6
CCT5
CD28
CD44
CD47
CD86
CDC73
CDCA7L
CDH19
CDH4
CEBPZ
CENPC
CENPW
CERK
CG-16
CHPT1
CHRM2
CHRNB4
CITED2
CLASP2
CLN8
CNDP2
COA5
COL20A1
COMMD8
COX17
COX20
COX6C
COX7A2L
CREBL2
CREM
CRHR1
CTGF
CTLA4
CTNNA2
CTTNBP2
CXCL12
DCBLD2
DCLRE1A
DCTD
DDX1
DENND6A
DHRS3
DIEXF
DIO2
DIO3
DISP3
DLX1
DNAJA2
DNM1L
DPYS
DRD1
DROSHA
DUSP6
EHF
EIF1AY
EIF3H
ELMO1
ENTPD1
EOGT
EPHA3
EPHA5
EPHA7
EPM2A
ETFA
ETS1
ETV1
EVL
EXOC3
FABP7
FAH
FAM60A
FANCL
FBLN5
FDX1
FGF12
FGF9
FGL2
FHL5
FHOD1
FNDC4
FOXN2
FRZB
FUT11
FZD1
FZD4
GALNT1
GCM1
GGNBP2
GID8
GINM1
GLIPR1L
GLP1R
GLRX3
GNAI1
GPR143
GPR158
GTPBP4
HBZ
HERC2
HJURP
HMGB2
HPCAL1
HPGDS
HSPA13
HSPA8
HTR1B
IBA57
IFIH1
IGF1
IGF2R
IKZF1
IL1B
IL6
IMMP2L
IMMT
IMP4
INSIG1
IRX1
IRX2
JARID2
KCNA4
KCNG2
KCNIP4
KDM3A
KIF5C
KITLG
KTN1
LAMB4
LAMP1
LANCL1
LCORL
LGALS3
LHX3
LIN28A
LMBR1
LMO2
LMO4
LOC419429
LOC422426
LOC769139
LOC771456
LONP2
LRRC6
LRRTM3
LSAMP
LSM14A
LYSMD2
MAB21L2
MANSC1
MAPRE2
MAT1A
MBOAT1
MC4R
MCM9
MED27
METAP1
MID1
MIER1
MIR103A2
MIR147-1
MIR1558
MIR155HG
MIR1568
MIR1575
MIR1590
MIR1599
MIR1613
MIR1620
MIR1624
MIR1626
MIR1660
MIR1664
MIR1695
MIR1696
MIR1722
MIR1730
MIR1741
MIR1746
MIR1782
MIR1803
MIR1805
MIR1806
MIR1812
MIR1813-2
MIR181A1
MIR302B
MIR32
MIR490
MIR6562
MIR6570
MIR6572
MIR6605
MIR6608-1
MIR6626
MIR6628
MIR6634
MIR6652
MIR6671
MIR6696
MIR6727
MIR6755
MIR7446
MIR99A
MITF
MMADHC
MMR1L2
MPC1
MRAS
MRPS5
MSN
MSX1
MTF1
MTIF3
MTNR1B
MTPN
MX1
MYF6
MYOZ2
NAIF1
NDC80
NDEL1
NDUFA4
NEUROD1
NHLH2
NINJ1
NKAIN2
NLGN1
NLGN4L
NMU
NOCT
NPBWR1
NPY1R
NR2F2
NRXN1
NSMCE2
NT5C3A
NTPCR
NTS
NUCB2
NUF2
OPTN
OSTC
P2RY6
PABPC1
PAICS
PALMD
PAPD7
PARS2
PCDH10
PCDH15
PDCD5
PECR
PERP2
PEX2
PIK3CG
PIP4K2A
PITX2
PKD2
PKIB
PLA2G4A
PLCZ1
PLS3
PNAT3
POFUT1
POLR2B
POMT1
POPDC3
POSTN
POT1
PPIF
PPP3CB
PRIM2
PRKAR1A
PRKCA
PRKDC
PRLHR
PRPH2
PRRG4
PSKH1
PSMC1
PTH1R
PTP4A1
PTPN2
PUM2
PUS7
QKI
RAB11A
RAB5A
RABL3
RAD52
RALYL
RAP1GDS1
RARB
RBM12B
REEP3
RFC3
RFT1
RHAG
ROMO1
RPIA
RPL26L1
RPL5
RPS13
RPS24
RPS29
RPS6KA5
RUNX1T1
SALL1
SALL3
SAMM50
SAP18
SASH3
SATB2
SCN5A
SDK1
SEC61A2
SEMA3D
SEPT7
SERINC1
SERPINB6L
SERPINC1
SETD3
SF3A1
SGCB
SH3BP5
SHH
SHISA2
SHOX
SIRT5
SLA
SLC10A2
SLC16A7
SLC25A13
SLC46A3
SLC7A1
SLCO1C1
SLIT3
SMYD1
SNX13
SOCS4
SOCS6
SOT3A1L
SOUL
SOX14
SOX17
SPCS3
SPIA4
SPRY1
SPTSSB
SSR1
ST8SIA1
STAU1
STK10
STK17B
STMN1
STRAP
SUCLG2
SUPT20H
SUV39H2
SYNCRIP
TACC3
TAF5
TARDBP
TBX20
TBX3
TEAD1
TEC
TESC
TFAP2B
TGFBR2
THY1
TIA1
TLCD1
TLR4
TMC3
TMEM128
TMEM17
TMEM258
TMEM55A
TMEM88B
TNFRSF18
TOX3
TPM3
TRABD
TRIB2
TRIM71
TRPA1
TSC22D3
TSHR
TSPAN14
TSSC1
TSSC4
TTC7B
TTR
TUBB2B
TYRO3
UBE2E3
UBE2N
UBE2V2
UBE3C
UBL3
UBXN2A
UCHL1
UGGT2
UGT8
USP15
UVRAG
VAV3
VEGFD
VPS39
WDR1
WDR59
WNT11
WNT5A
WNT5B
YIPF7
YTHDF3
ZC3H14
ZDHHC17
ZFP36L2
ZFYVE19
ZNF326
ZPBP

## Sheet: Biological Process
Analysis Type:	PANTHER Overrepresentation Test (Released 20181113)
Annotation Version and Release Date:	GO Ontology database Released 2018-12-01
Analyzed List:	upload_1 (Gallus gallus)
Reference List:	Gallus gallus (all genes in database)
Test Type:	FISHER
Correction:	BONFERRONI
Bonferroni count:	6611
GO biological process complete	Gallus gallus - REFLIST (19122)	Gene Number in Uploaded List	Expected value	upload_1 (over/under)	Fold Enrichment	P-value	Genes in Uploaded List (Only show top 30)
ventricular septum morphogenesis (GO:0060412)	32	9	0.78	+	11.47	0.00281	TGFBR2 FZD1 WNT5A BMP4 WNT11 PITX2 TBX3 SLIT3 CITED2
outflow tract morphogenesis (GO:0003151)	51	13	1.25	+	10.39	2.05e-05	TGFBR2 FZD1 WNT5A BMP4 BMPR1A WNT11 RARB TBX20 PITX2 NPY1R DHRS3 TBX3 CITED2
cardiac septum morphogenesis (GO:0060411)	58	13	1.42	+	9.14	7.8e-05	TGFBR2 FZD1 WNT5A BMP4 BMPR1A WNT11 RARB TBX20 PITX2 DHRS3 TBX3 SLIT3 CITED2
ventricular septum development (GO:0003281)	50	10	1.23	+	8.15	0.00959	TGFBR2 FZD1 WNT5A BMP4 WNT11 PITX2 LMO4 TBX3 SLIT3 CITED2
axis specification (GO:0009798)	61	11	1.5	+	7.35	0.00706	BMP4 ACVR2A WNT5A SHH BMP4 TBX3 BMPR1A PITX2 TBX3 SHH CITED2
hormone transport (GO:0009914)	70	12	1.72	+	6.99	0.0037	ADCYAP1 TBX3 MC4R NEUROD1 CRHR1 IL1B FZD4 PRKCA TBX3 CRHR1 TTR SLCO1C1
cardiac septum development (GO:0003279)	82	14	2.01	+	6.96	0.000441	TGFBR2 FZD1 WNT5A BMP4 BMPR1A WNT11 RARB TBX20 PITX2 DHRS3 LMO4 TBX3 SLIT3 CITED2
specification of symmetry (GO:0009799)	83	14	2.04	+	6.88	0.000504	TGFBR2 PITX2 ACVR2A AIDA PSKH1 WNT5A SHH BMP4 TBX20 PITX2 PKD2 TBX3 CITED2 LRRC6
determination of bilateral symmetry (GO:0009855)	82	13	2.01	+	6.46	0.00278	TGFBR2 PITX2 ACVR2A AIDA PSKH1 WNT5A SHH TBX20 PITX2 PKD2 TBX3 CITED2 LRRC6
determination of left/right symmetry (GO:0007368)	76	12	1.86	+	6.44	0.00805	TGFBR2 PITX2 ACVR2A PSKH1 WNT5A SHH TBX20 PITX2 PKD2 TBX3 CITED2 LRRC6
cardiac chamber morphogenesis (GO:0003206)	98	13	2.4	+	5.41	0.0169
cardiac ventricle development (GO:0003231)	91	12	2.23	+	5.38	0.0433
kidney epithelium development (GO:0072073)	99	13	2.43	+	5.35	0.0187
endocrine system development (GO:0035270)	103	13	2.53	+	5.15	0.0278
cell-cell signaling by wnt (GO:0198738)	152	19	3.73	+	5.1	0.0002
embryonic appendage morphogenesis (GO:0035113)	113	14	2.77	+	5.05	0.0145
appendage morphogenesis (GO:0035107)	133	16	3.26	+	4.9	0.00394
Wnt signaling pathway (GO:0016055)	151	18	3.7	+	4.86	0.000886
limb morphogenesis (GO:0035108)	132	15	3.24	+	4.63	0.0169
cardiac chamber development (GO:0003205)	125	14	3.07	+	4.57	0.0423
cell fate commitment (GO:0045165)	176	19	4.32	+	4.4	0.00163
regulation of T cell activation (GO:0050863)	160	17	3.92	+	4.33	0.00856
appendage development (GO:0048736)	163	17	4	+	4.25	0.0108
cell surface receptor signaling pathway involved in cell-cell signaling (GO:1905114)	219	22	5.37	+	4.1	0.000592
regulation of cell-cell adhesion (GO:0022407)	220	22	5.4	+	4.08	0.000636
limb development (GO:0060173)	162	16	3.97	+	4.03	0.0414
heart morphogenesis (GO:0003007)	197	19	4.83	+	3.93	0.00787
epithelial tube morphogenesis (GO:0060562)	208	20	5.1	+	3.92	0.00431
embryonic organ morphogenesis (GO:0048562)	251	24	6.16	+	3.9	0.000362
embryonic organ development (GO:0048568)	303	28	7.43	+	3.77	5.54e-05
mesenchyme development (GO:0060485)	184	17	4.51	+	3.77	0.0484
sensory organ morphogenesis (GO:0090596)	211	19	5.18	+	3.67	0.0201
morphogenesis of an epithelium (GO:0002009)	292	26	7.16	+	3.63	0.000379
embryonic morphogenesis (GO:0048598)	442	39	10.84	+	3.6	2.14e-07
regionalization (GO:0003002)	275	24	6.74	+	3.56	0.00173
pattern specification process (GO:0007389)	344	30	8.44	+	3.56	5.53e-05
forebrain development (GO:0030900)	266	23	6.52	+	3.53	0.00357
regulation of lymphocyte activation (GO:0051249)	259	22	6.35	+	3.46	0.00829
regulation of hormone levels (GO:0010817)	313	26	7.68	+	3.39	0.00134
tissue morphogenesis (GO:0048729)	415	34	10.18	+	3.34	2.4e-05
regulation of cell activation (GO:0050865)	318	26	7.8	+	3.33	0.00178
muscle tissue development (GO:0060537)	247	20	6.06	+	3.3	0.0489
eye development (GO:0001654)	263	21	6.45	+	3.26	0.0355
visual system development (GO:0150063)	263	21	6.45	+	3.26	0.0355
sensory system development (GO:0048880)	267	21	6.55	+	3.21	0.0441
embryo development (GO:0009790)	574	45	14.08	+	3.2	2.43e-07
embryo development ending in birth or egg hatching (GO:0009792)	298	23	7.31	+	3.15	0.0216
heart development (GO:0007507)	391	30	9.59	+	3.13	0.000781
regulation of leukocyte activation (GO:0002694)	300	23	7.36	+	3.13	0.024
cell-cell signaling (GO:0007267)	547	41	13.42	+	3.06	6.59e-06
muscle structure development (GO:0061061)	323	24	7.92	+	3.03	0.0244
tube morphogenesis (GO:0035239)	433	32	10.62	+	3.01	0.000655
sensory organ development (GO:0007423)	406	30	9.96	+	3.01	0.00166
developmental process involved in reproduction (GO:0003006)	314	23	7.7	+	2.99	0.0484
regulation of cell adhesion (GO:0030155)	408	29	10.01	+	2.9	0.00556
regulation of cell migration (GO:0030334)	533	37	13.07	+	2.83	0.000291
skeletal system development (GO:0001501)	378	26	9.27	+	2.8	0.0359
brain development (GO:0007420)	437	30	10.72	+	2.8	0.00705
head development (GO:0060322)	470	32	11.53	+	2.78	0.00364
response to lipid (GO:0033993)	399	27	9.79	+	2.76	0.0314
regulation of cell population proliferation (GO:0042127)	965	65	23.67	+	2.75	4.91e-09
positive regulation of immune system process (GO:0002684)	511	34	12.53	+	2.71	0.00263
central nervous system development (GO:0007417)	587	39	14.4	+	2.71	0.000371
regulation of cell motility (GO:2000145)	562	37	13.78	+	2.68	0.00102
circulatory system development (GO:0072359)	607	39	14.89	+	2.62	0.000845
anatomical structure formation involved in morphogenesis (GO:0048646)	611	39	14.99	+	2.6	0.000991
animal organ morphogenesis (GO:0009887)	691	44	16.95	+	2.6	0.000248
regulation of locomotion (GO:0040012)	613	39	15.03	+	2.59	0.00177
regulation of immune system process (GO:0002682)	766	48	18.79	+	2.55	6.94e-05
regulation of cellular component movement (GO:0051270)	609	38	14.94	+	2.54	0.00324
tube development (GO:0035295)	579	36	14.2	+	2.54	0.0072
positive regulation of cell population proliferation (GO:0008284)	552	34	13.54	+	2.51	0.0171
epithelium development (GO:0060429)	628	38	15.4	+	2.47	0.0055
negative regulation of cell death (GO:0060548)	563	34	13.81	+	2.46	0.023
cellular response to endogenous stimulus (GO:0071495)	699	42	17.14	+	2.45	0.0016
locomotion (GO:0040011)	785	47	19.25	+	2.44	0.000475
response to endogenous stimulus (GO:0009719)	789	47	19.35	+	2.43	0.000507
positive regulation of cell differentiation (GO:0045597)	588	35	14.42	+	2.43	0.021
positive regulation of developmental process (GO:0051094)	866	51	21.24	+	2.4	0.000152
anatomical structure morphogenesis (GO:0009653)	1506	87	36.94	+	2.36	1.7e-09
cellular response to organic substance (GO:0071310)	1258	72	30.85	+	2.33	5.21e-07
positive regulation of cellular component organization (GO:0051130)	742	42	18.2	+	2.31	0.00728
regulation of cell differentiation (GO:0045595)	1136	64	27.86	+	2.3	1.23e-05
cell development (GO:0048468)	1190	67	29.19	+	2.3	4.46e-06
positive regulation of transcription by RNA polymerase II (GO:0045944)	945	53	23.18	+	2.29	0.00035
tissue development (GO:0009888)	1113	62	27.3	+	2.27	3.13e-05
positive regulation of multicellular organismal process (GO:0051240)	1043	58	25.58	+	2.27	0.000124
response to organic substance (GO:0010033)	1558	86	38.21	+	2.25	2.91e-08
neuron differentiation (GO:0030182)	743	41	18.22	+	2.25	0.0222
response to oxygen-containing compound (GO:1901700)	737	40	18.08	+	2.21	0.0389
cell surface receptor signaling pathway (GO:0007166)	1351	72	33.14	+	2.17	8.49e-06
regulation of developmental process (GO:0050793)	1670	87	40.96	+	2.12	4.72e-07
negative regulation of gene expression (GO:0010629)	1153	60	28.28	+	2.12	0.000606
positive regulation of transcription, DNA-templated (GO:0045893)	1193	62	29.26	+	2.12	0.000345
cellular response to chemical stimulus (GO:0070887)	1598	83	39.19	+	2.12	1.17e-06
regulation of multicellular organismal development (GO:2000026)	1302	67	31.93	+	2.1	0.000138
positive regulation of gene expression (GO:0010628)	1460	74	35.81	+	2.07	5.47e-05
positive regulation of RNA metabolic process (GO:0051254)	1304	66	31.98	+	2.06	0.000401
regulation of protein phosphorylation (GO:0001932)	953	48	23.37	+	2.05	0.0369
positive regulation of RNA biosynthetic process (GO:1902680)	1251	63	30.68	+	2.05	0.0011
positive regulation of nucleic acid-templated transcription (GO:1903508)	1251	63	30.68	+	2.05	0.0011
nervous system development (GO:0007399)	1551	78	38.04	+	2.05	1.91e-05
negative regulation of RNA metabolic process (GO:0051253)	955	48	23.42	+	2.05	0.0379
regulation of multicellular organismal process (GO:0051239)	1932	97	47.39	+	2.05	1.97e-07
regulation of phosphorylation (GO:0042325)	1037	52	25.43	+	2.04	0.0128
negative regulation of cellular macromolecule biosynthetic process (GO:2000113)	999	50	24.5	+	2.04	0.0229
regulation of transcription by RNA polymerase II (GO:0006357)	1579	79	38.73	+	2.04	2.37e-05
positive regulation of macromolecule biosynthetic process (GO:0010557)	1405	70	34.46	+	2.03	0.000249
positive regulation of nucleobase-containing compound metabolic process (GO:0045935)	1429	71	35.05	+	2.03	0.000196
animal organ development (GO:0048513)	1938	96	47.53	+	2.02	3.87e-07
neurogenesis (GO:0022008)	1180	58	28.94	+	2	0.00685
cellular developmental process (GO:0048869)	2442	120	59.89	+	2	1.3e-09
negative regulation of macromolecule biosynthetic process (GO:0010558)	1042	51	25.56	+	2	0.0352
generation of neurons (GO:0048699)	1104	54	27.08	+	1.99	0.0161
negative regulation of biosynthetic process (GO:0009890)	1085	53	26.61	+	1.99	0.0214
positive regulation of biosynthetic process (GO:0009891)	1466	71	35.96	+	1.97	0.000495
negative regulation of nucleobase-containing compound metabolic process (GO:0045934)	1054	51	25.85	+	1.97	0.0429
negative regulation of cellular biosynthetic process (GO:0031327)	1076	52	26.39	+	1.97	0.0481
cell differentiation (GO:0030154)	2360	114	57.88	+	1.97	1.56e-08
positive regulation of cellular biosynthetic process (GO:0031328)	1450	70	35.56	+	1.97	0.0007
regulation of biological quality (GO:0065008)	2715	131	66.59	+	1.97	2.48e-10
response to chemical (GO:0042221)	2408	115	59.06	+	1.95	2.46e-08
regulation of localization (GO:0032879)	1707	81	41.87	+	1.93	0.000138
regulation of cellular component organization (GO:0051128)	1649	78	40.44	+	1.93	0.000354
multicellular organism development (GO:0007275)	3077	145	75.47	+	1.92	3.14e-11
positive regulation of response to stimulus (GO:0048584)	1326	62	32.52	+	1.91	0.0163
developmental process (GO:0032502)	3583	167	87.88	+	1.9	1.56e-13
anatomical structure development (GO:0048856)	3391	158	83.17	+	1.9	2.24e-12
negative regulation of macromolecule metabolic process (GO:0010605)	1767	82	43.34	+	1.89	0.000244
regulation of signal transduction (GO:0009966)	2050	93	50.28	+	1.85	8.29e-05
positive regulation of cellular process (GO:0048522)	3606	163	88.44	+	1.84	7.43e-12
system development (GO:0048731)	2810	126	68.92	+	1.83	1.3e-07
regulation of cell communication (GO:0010646)	2300	103	56.41	+	1.83	2.14e-05
regulation of signaling (GO:0023051)	2315	103	56.78	+	1.81	2.43e-05
negative regulation of metabolic process (GO:0009892)	1913	85	46.92	+	1.81	0.00107
negative regulation of nitrogen compound metabolic process (GO:0051172)	1643	73	40.3	+	1.81	0.00831
regulation of nucleobase-containing compound metabolic process (GO:0019219)	2782	123	68.23	+	1.8	6.71e-07
regulation of RNA metabolic process (GO:0051252)	2584	114	63.38	+	1.8	4.22e-06
regulation of response to stimulus (GO:0048583)	2640	116	64.75	+	1.79	3.85e-06
positive regulation of metabolic process (GO:0009893)	2518	110	61.76	+	1.78	1.6e-05
negative regulation of cellular metabolic process (GO:0031324)	1744	76	42.77	+	1.78	0.0104
positive regulation of biological process (GO:0048518)	4070	177	99.82	+	1.77	8.07e-12
regulation of nucleic acid-templated transcription (GO:1903506)	2404	104	58.96	+	1.76	9.94e-05
regulation of RNA biosynthetic process (GO:2001141)	2405	104	58.99	+	1.76	0.0001
regulation of transcription, DNA-templated (GO:0006355)	2365	102	58.01	+	1.76	0.000181
positive regulation of macromolecule metabolic process (GO:0010604)	2348	101	57.59	+	1.75	0.000248
positive regulation of cellular metabolic process (GO:0031325)	2328	100	57.1	+	1.75	0.000235
regulation of cellular macromolecule biosynthetic process (GO:2000112)	2665	114	65.36	+	1.74	2.51e-05
regulation of macromolecule biosynthetic process (GO:0010556)	2738	117	67.15	+	1.74	1.64e-05
negative regulation of biological process (GO:0048519)	3467	147	85.03	+	1.73	5.93e-08
regulation of cellular biosynthetic process (GO:0031326)	2814	119	69.02	+	1.72	1.73e-05
positive regulation of nitrogen compound metabolic process (GO:0051173)	2252	95	55.23	+	1.72	0.00161
multicellular organismal process (GO:0032501)	4128	174	101.25	+	1.72	2.96e-10
negative regulation of cellular process (GO:0048523)	3149	132	77.23	+	1.71	2.59e-06
regulation of biosynthetic process (GO:0009889)	2845	119	69.78	+	1.71	3.15e-05
regulation of gene expression (GO:0010468)	2973	124	72.92	+	1.7	1.72e-05
regulation of cellular metabolic process (GO:0031323)	4221	171	103.53	+	1.65	2.1e-08
regulation of primary metabolic process (GO:0080090)	4125	166	101.17	+	1.64	1.05e-07
regulation of nitrogen compound metabolic process (GO:0051171)	4035	162	98.97	+	1.64	2.41e-07
regulation of metabolic process (GO:0019222)	4508	179	110.57	+	1.62	2.95e-08
signal transduction (GO:0007165)	3124	122	76.62	+	1.59	0.000984
regulation of macromolecule metabolic process (GO:0060255)	4192	163	102.82	+	1.59	2.9e-06
response to stimulus (GO:0050896)	5259	201	128.99	+	1.56	1.66e-08
cellular response to stimulus (GO:0051716)	4338	165	106.4	+	1.55	9.72e-06
signaling (GO:0023052)	3349	127	82.14	+	1.55	0.00289
cell communication (GO:0007154)	3444	129	84.47	+	1.53	0.00392
regulation of cellular process (GO:0050794)	7750	280	190.08	+	1.47	1.32e-12
regulation of biological process (GO:0050789)	8257	295	202.52	+	1.46	2.04e-13
biological regulation (GO:0065007)	8962	315	219.81	+	1.43	1.78e-14
cellular component organization or biogenesis (GO:0071840)	4239	148	103.97	+	1.42	0.0255
cellular metabolic process (GO:0044237)	5600	184	137.35	+	1.34	0.0397
cellular process (GO:0009987)	11116	354	272.64	+	1.3	7.87e-11
biological_process (GO:0008150)	14320	427	351.22	+	1.22	8.2e-15
Unclassified (UNCLASSIFIED)	4802	42	117.78	-	0.36	0

## Sheet: Molecular Function
Analysis Type:	PANTHER Overrepresentation Test (Released 20181113)
Annotation Version and Release Date:	GO Ontology database Released 2018-12-01
Analyzed List:	upload_1 (Gallus gallus)
Reference List:	Gallus gallus (all genes in database)
Test Type:	FISHER
Correction:	BONFERRONI
Bonferroni count:	2202
GO molecular function complete	Gallus gallus - REFLIST (19122)	Gene Number in Uploaded List	Expected value	upload_1 (over/under)	Fold Enrichment	P-value	Genes in Uploaded List (Only show top 30)
BMP receptor binding (GO:0070700)	9	5	0.22	+	22.65	0.0284	BMP4 BMP4 BMP2 BMP3 BMP2
GPI-linked ephrin receptor activity (GO:0005004)	9	5	0.22	+	22.65	0.0284	EPHA3 EPHA3 EPHA5 EPHA7 EPHA5
single-stranded RNA binding (GO:0003727)	66	10	1.62	+	6.18	0.0287	SYNCRIP IFIH1 DDX1 ZC3H14 DDX1 ZC3H14 TARDBP PABPC1 CBX4 LSM14A
receptor ligand activity (GO:0048018)	331	25	8.12	+	3.08	0.00389	LGALS3 BMP4 FGF9 ADCYAP1 WNT5A BMP4 IL6 SEMA3D IGF1 CXCL12 WNT11 IL1B KITLG CCK FGF12 NMU CCK TTR SHH NTS HMGB2 EPHA7 BMP2 BMP3 BMP2
receptor regulator activity (GO:0030545)	355	25	8.71	+	2.87	0.0124	LGALS3 BMP4 FGF9 ADCYAP1 WNT5A BMP4 IL6 SEMA3D IGF1 CXCL12 WNT11 IL1B KITLG CCK FGF12 NMU CCK TTR SHH NTS HMGB2 EPHA7 BMP2 BMP3 BMP2
signaling receptor binding (GO:0005102)	1069	53	26.22	+	2.02	0.00552	TGFBR2 NRXN1 LGALS3 BMP4 ACVR2A NMU WNT5B GNAI1 PTPN2 FGF9 PECR ADCYAP1 FZD1 LANCL1 WNT5A SHH LONP2 BMP4 IL6 SEMA3D CTGF IGF1 CXCL12 WNT11 PIK3CG FBLN5 TLR4 GNAI1 UBXN2A IL1B
DNA binding (GO:0003677)	1693	80	41.52	+	1.93	6.63e-05	GCM1 BASP1 IFIH1 POT1 POT1 PITX2 RAD52 SOX14 LCORL TFAP2B IRX1 LIN28A TAF5 MIER1 PDCD5 WNT5A ETS1 TBX3 LMO2 JARID2 FOXN2 MSX1 TARDBP CENPW DLX1 NEUROD1 DDX1 ETS1 CEBPZ WNT11
nucleic acid binding (GO:0003676)	2810	115	68.92	+	1.67	8.61e-05	SYNCRIP GCM1 BASP1 IFIH1 POT1 STAU1 POT1 DIEXF PITX2 RAD52 SOX14 LCORL CCT5 TFAP2B IRX1 LIN28A TAF5 MIER1 DDX1 PDCD5 RALYL WNT5A ETS1 TBX3 LMO2 ZC3H14 JARID2 FOXN2 YTHDF3 MRPS5
protein binding (GO:0005515)	5249	194	128.74	+	1.51	4.29e-07	STK10 GCM1 IFIH1 MAT1A PPIF DNAJA2 MYOZ2 TGFBR2 NRXN1 HSPA8 FANCL POT1 HPGDS EVL EPM2A PLS3 KTN1 PITX2 SETD3 TYRO3 SDK1 CHRM2 SOX14 LGALS3 BMP4 CDC73 ACVR2A UVRAG CCT5 NMU
heterocyclic compound binding (GO:1901363)	4625	167	113.44	+	1.47	0.000101	SYNCRIP STK10 RABL3 GCM1 BASP1 IFIH1 MAT1A DNAJA2 TGFBR2 HSPA8 POT1 STAU1 PSMC1 POT1 DIEXF PITX2 TYRO3 SUCLG2 RAD52 SOX14 ACVR2A LCORL CCT5 GNAI1 TFAP2B ETFA IRX1 LIN28A TAF5 ACAD11
organic cyclic compound binding (GO:0097159)	4684	169	114.88	+	1.47	8.41e-05
binding (GO:0005488)	9919	327	243.28	+	1.34	2.06e-11
molecular_function (GO:0003674)	13507	390	331.28	+	1.18	1.53e-06
Unclassified (UNCLASSIFIED)	5615	79	137.72	-	0.57	0

## Sheet: Cellular Component
Analysis Type:	PANTHER Overrepresentation Test (Released 20181113)
Annotation Version and Release Date:	GO Ontology database Released 2018-12-01
Analyzed List:	upload_1 (Gallus gallus)
Reference List:	Gallus gallus (all genes in database)
Test Type:	FISHER
Correction:	BONFERRONI
Bonferroni count:	1171
GO cellular component complete	Gallus gallus - REFLIST (19122)	Gene Number in Uploaded List	Expected value	upload_1 (over/under)	Fold Enrichment	P-value	Genes in Uploaded List (Only show top 30)
cytoplasmic stress granule (GO:0010494)	39	8	0.96	+	8.36	0.0165	LIN28A DDX1 TIA1 PABPC1 PUM2 TIA1 LSM14A LIN28A
intrinsic component of plasma membrane (GO:0031226)	1072	52	26.29	+	1.98	0.00563	PCDH10 KCNA4 TGFBR2 NRXN1 TYRO3 CHRM2 DCBLD2 TMC3 ACVR2A LRRTM3 RHAG PCDH15 IL6 SEMA3D CCKAR TSPAN14 ANKH BMPR1A APCDD1 DRD1 TLR4 EPHA3 SCN5A EPHA3 CDH4 EPHA5 SLC16A7 THY1 PKD2 TRPA1
integral component of plasma membrane (GO:0005887)	1028	49	25.21	+	1.94	0.023	PCDH10 KCNA4 TGFBR2 NRXN1 TYRO3 CHRM2 DCBLD2 TMC3 ACVR2A LRRTM3 RHAG PCDH15 IL6 SEMA3D CCKAR TSPAN14 ANKH BMPR1A APCDD1 DRD1 TLR4 EPHA3 SCN5A EPHA3 CDH4 EPHA5 SLC16A7 PKD2 TRPA1 TYRO3
plasma membrane part (GO:0044459)	1908	78	46.8	+	1.67	0.0143	BASP1 PCDH10 KCNA4 TGFBR2 NRXN1 TYRO3 CHRM2 DCBLD2 TMC3 LGALS3 ACVR2A CD86 LRRTM3 RHAG GNAI1 PCDH15 IL6 SEMA3D CCKAR TSPAN14 IGF1 ANKH CXCL12 BMPR1A APCDD1 PPP3CB ADD3 CCR6 DRD1 TESC
plasma membrane (GO:0005886)	3227	117	79.15	+	1.48	0.0146	STK10 BASP1 PCDH10 KCNA4 TGFBR2 NRXN1 STAU1 PLS3 NAIF1 TYRO3 SUCLG2 SDK1 CHRM2 DCBLD2 TMC3 TTC7B LGALS3 ACVR2A CD86 LRRTM3 RHAG GNAI1 PTPN2 PCDH15 PIP4K2A TESC FNDC4 LANCL1 SHH MC4R
cell periphery (GO:0071944)	3374	120	82.75	+	1.45	0.0271	STK10 BASP1 PCDH10 KCNA4 TGFBR2 NRXN1 STAU1 PLS3 NAIF1 TYRO3 SUCLG2 SDK1 CHRM2 DCBLD2 TMC3 TTC7B LGALS3 ACVR2A CD86 LRRTM3 RHAG GNAI1 PTPN2 PCDH15 FABP7 PIP4K2A TESC FNDC4 LANCL1 SHH
protein-containing complex (GO:0032991)	4382	150	107.48	+	1.4	0.0101	SYNCRIP GCM1 KCNA4 PPIF TGFBR2 NRXN1 FANCL POT1 SUPT20H VPS39 STAU1 EPM2A SLC7A1 NSMCE2 PSMC1 POT1 DIEXF TYRO3 SOX14 CDC73 ACVR2A MED27 UVRAG CCT5 NDUFA4 GNAI1 TMEM258 LIN28A TAF5 SEC61A2
nucleus (GO:0005634)	5190	176	127.29	+	1.38	0.00153	SYNCRIP GCM1 GGNBP2 BASP1 NRXN1 FANCL POT1 SUPT20H EPM2A NSMCE2 PSMC1 NUCB2 POT1 DIEXF NAIF1 PITX2 SETD3 DISP3 RAD52 SOX14 UBE2V2 LGALS3 PLCZ1 CDC73 LCORL COMMD8 MED27 UVRAG CCT5 PTPN2
membrane-bounded organelle (GO:0043227)	8130	260	199.4	+	1.3	3.38e-05	SYNCRIP GCM1 GGNBP2 AGA BASP1 PPIF NRXN1 FANCL POT1 EVL SUPT20H VPS39 STAU1 EPM2A NSMCE2 KTN1 PSMC1 NUCB2 POT1 DIEXF NAIF1 PITX2 SETD3 POMT1 DISP3 SUCLG2 RAD52 SOX14 UBE2V2 LGALS3
intracellular membrane-bounded organelle (GO:0043231)	7652	244	187.68	+	1.3	0.000278	SYNCRIP GCM1 GGNBP2 AGA BASP1 PPIF NRXN1 FANCL POT1 EVL SUPT20H VPS39 STAU1 EPM2A NSMCE2 KTN1 PSMC1 NUCB2 POT1 DIEXF NAIF1 PITX2 SETD3 POMT1 DISP3 SUCLG2 RAD52 SOX14 UBE2V2 LGALS3
cell part (GO:0044464)	12479	390	306.07	+	1.27	2.6e-14
cell (GO:0005623)	12602	393	309.09	+	1.27	1.23e-14
organelle (GO:0043226)	9454	293	231.88	+	1.26	2.7e-05
intracellular organelle (GO:0043229)	9212	283	225.94	+	1.25	0.000222
intracellular (GO:0005622)	10680	319	261.95	+	1.22	0.000138
intracellular part (GO:0044424)	10680	319	261.95	+	1.22	0.000138
cellular_component (GO:0005575)	14926	436	366.09	+	1.19	8e-15
Unclassified (UNCLASSIFIED)	4196	33	102.91	-	0.32	0
